# Supplementary material for: Oxidative purification of halogenated ferrocenes
Source: Royal Society of Chemistry journal article supplement (doi:10.1039/c2dt32779a), 2012-11-22

## Supplementary information for:

### “Oxidative purification of halogenated ferrocenes”

Michael S. Inkpen, Shuoren Du, Mark Driver, Tim Albrecht,\* Nicholas J. Long\*

*Department of Chemistry, Imperial College London, London SW7 2AZ, U.K.; Tel: +44 (0)20 7594 5781;*

*E-mail: [n.long@imperial.ac.uk](mailto:n.long@imperial.ac.uk); [t.albrecht@imperial.ac.uk](mailto:t.albrecht@imperial.ac.uk)*

### Contents

S2: Electrochemistry of FcX/fcX<sub>2</sub>

S3-S8: <sup>1</sup>H/<sup>13</sup>C NMR of FcX/fcX<sub>2</sub>

## Electrochemistry

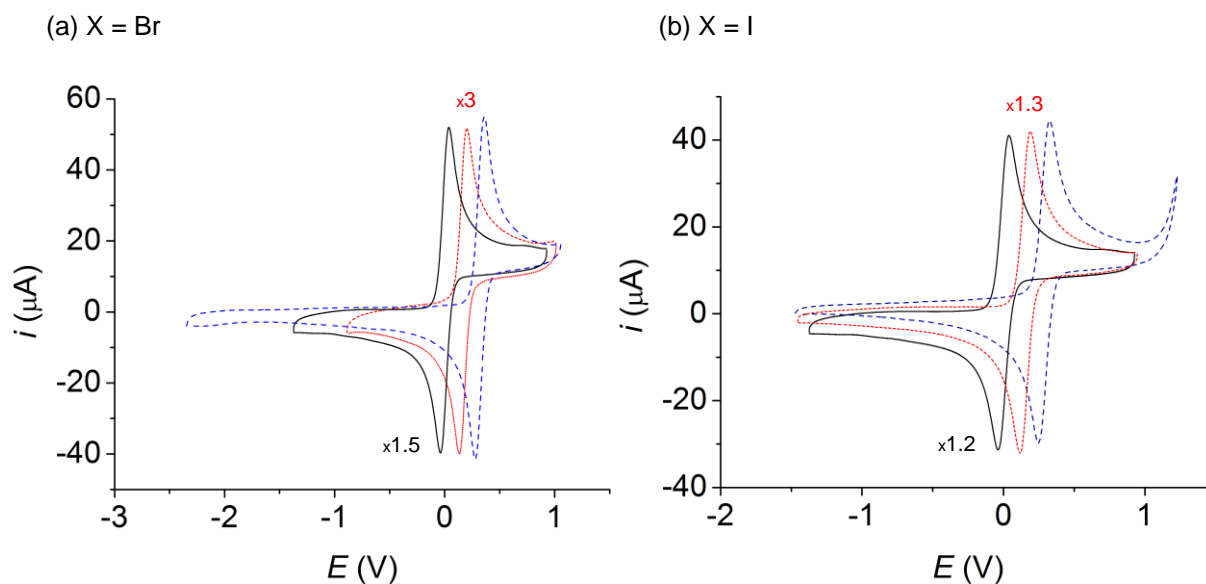

**Figure S1.** Cyclic voltammograms of FcH (black solid line), pure FcX (red dotted line) and  $fcX_2$  (blue dashed line) (potentials reported versus  $[FcH]^+/[FcH]$ ) – current scaled for clarity.

**Table S1.** Electrochemical data for the haloferrocenes.<sup>a</sup>

| compound | $E_{pa}$ (V) | $E_{pc}$ (V) | $\Delta E$ (V) <sup>b</sup> | $i_p^a/i_p^c$ | $E_{1/2}$ (V) <sup>c</sup> |
|----------|--------------|--------------|-----------------------------|---------------|----------------------------|
| FcI      | 0.116        | 0.194        | 0.078                       | 1.00          | 0.155                      |
| FcBr     | 0.133        | 0.201        | 0.068                       | 1.00          | 0.167                      |
| $fcI_2$  | 0.250        | 0.323        | 0.073                       | 1.04          | 0.287                      |
| $fcBr_2$ | 0.279        | 0.359        | 0.080                       | 1.03          | 0.319                      |

<sup>a</sup> For scan rate =  $0.1 \text{ Vs}^{-1}$ .  $Bu_4N^+PF_6^-$  (0.1 M) in MeCN; WE: glassy carbon; RE, CE: Pt. All potentials (error =  $\pm 0.02 \text{ V}$ ) assigned to the Fe(II)/Fe(III) redox couple and reported relative to an internal  $[FcH]^+/[FcH]$  reference. <sup>b</sup>  $\Delta E > 0.060 \text{ V}$  due to a small uncompensated solution resistance effect. <sup>c</sup>  $E_{1/2} = \frac{1}{2}(E_{pa} + E_{pc})$ .

## $^1\text{H}/^{13}\text{C}$ NMR spectroscopy

$^1\text{H}$  NMR spectrum for  $\text{fcI}_2$  in  $\text{CDCl}_3$

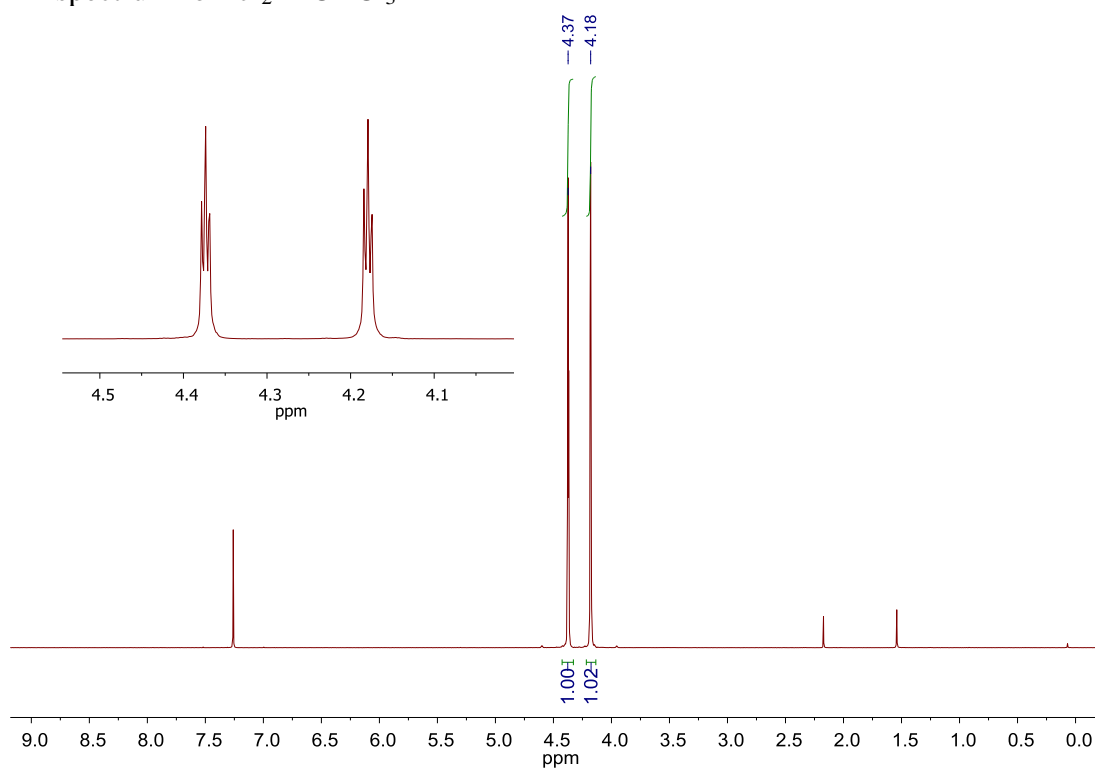

$^{13}\text{C}$  NMR spectrum for  $\text{fcI}_2$  in  $\text{CDCl}_3$

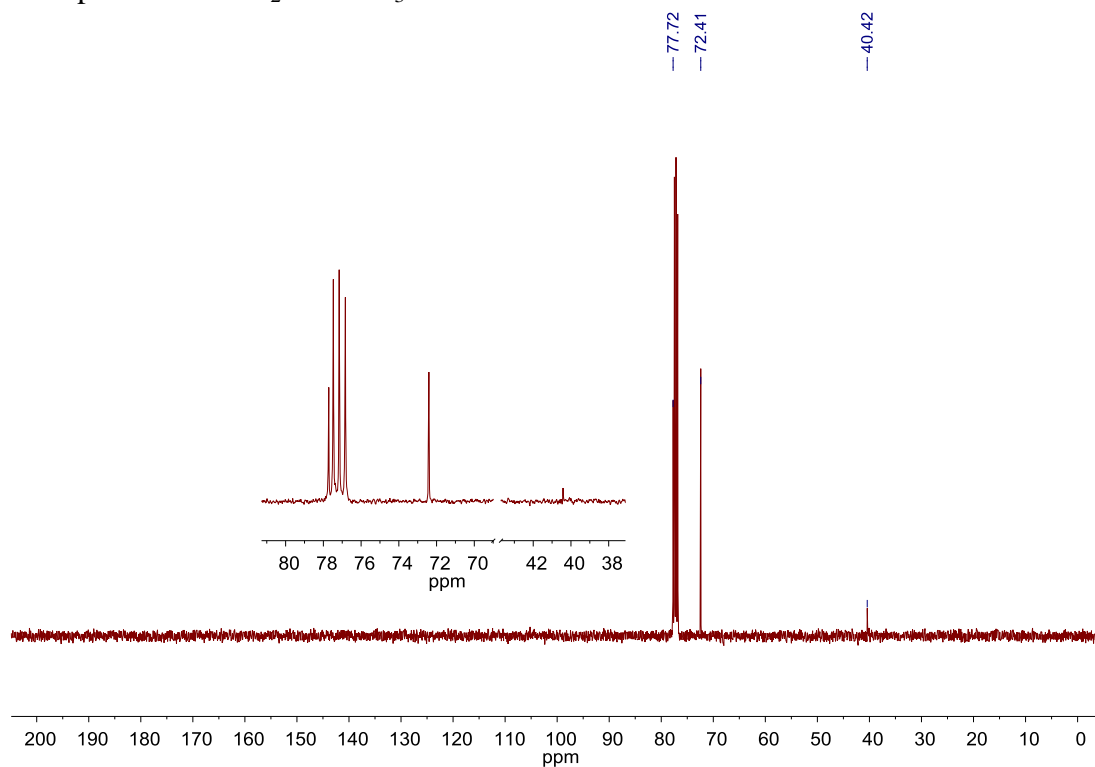

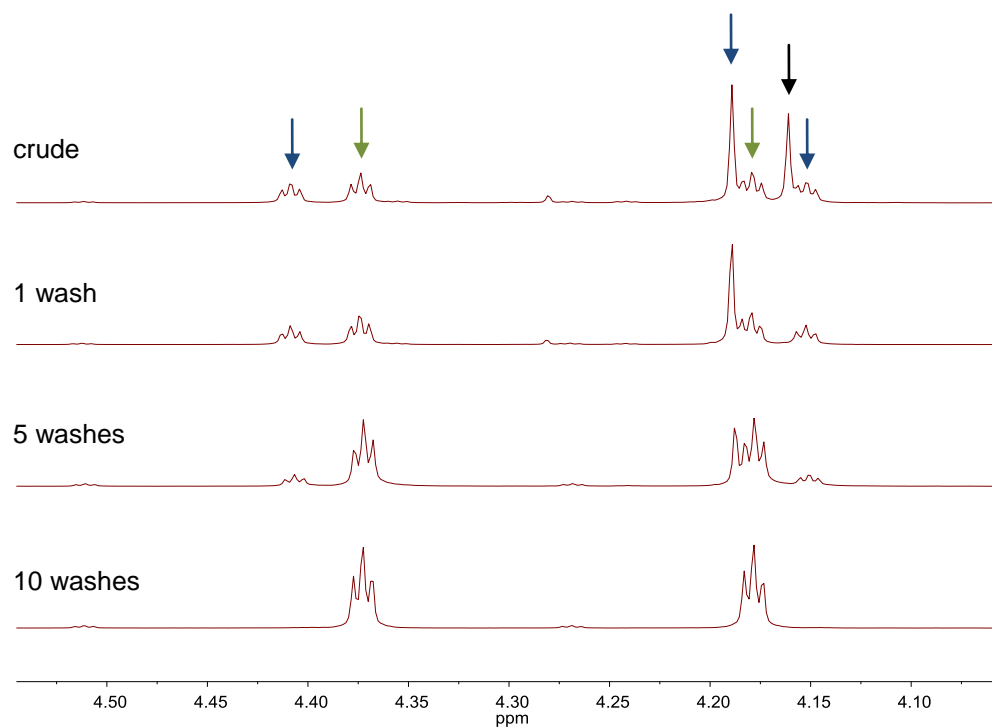

**Figure S2.** Selected <sup>1</sup>H NMR spectra in CDCl<sub>3</sub> showing the elimination of FcH (black arrow, after 1 wash with 0.5 M aqueous FeCl<sub>3</sub>) and FcI (blue arrows, after 10 washings) from their mixture with fcl<sub>2</sub> (green arrows).

$^1\text{H}$  NMR spectrum for  $\text{fcBr}_2$  in  $\text{CDCl}_3$

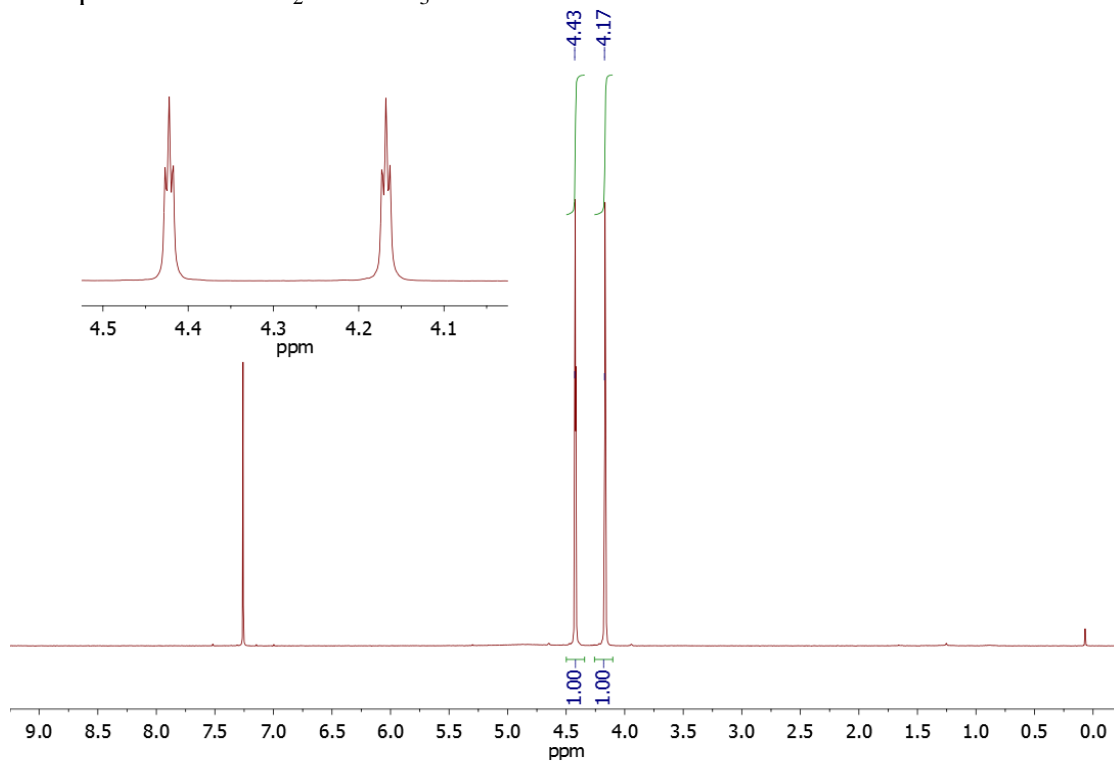

$^{13}\text{C}$  NMR spectrum for  $\text{fcBr}_2$  in  $\text{CDCl}_3$

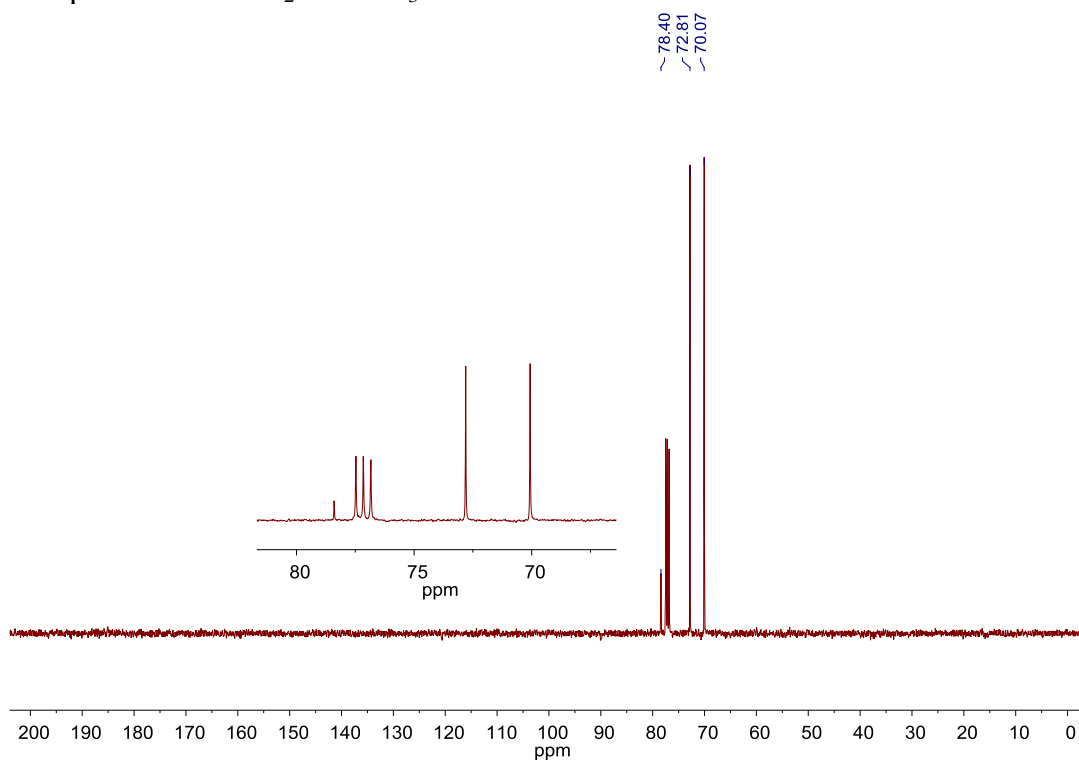

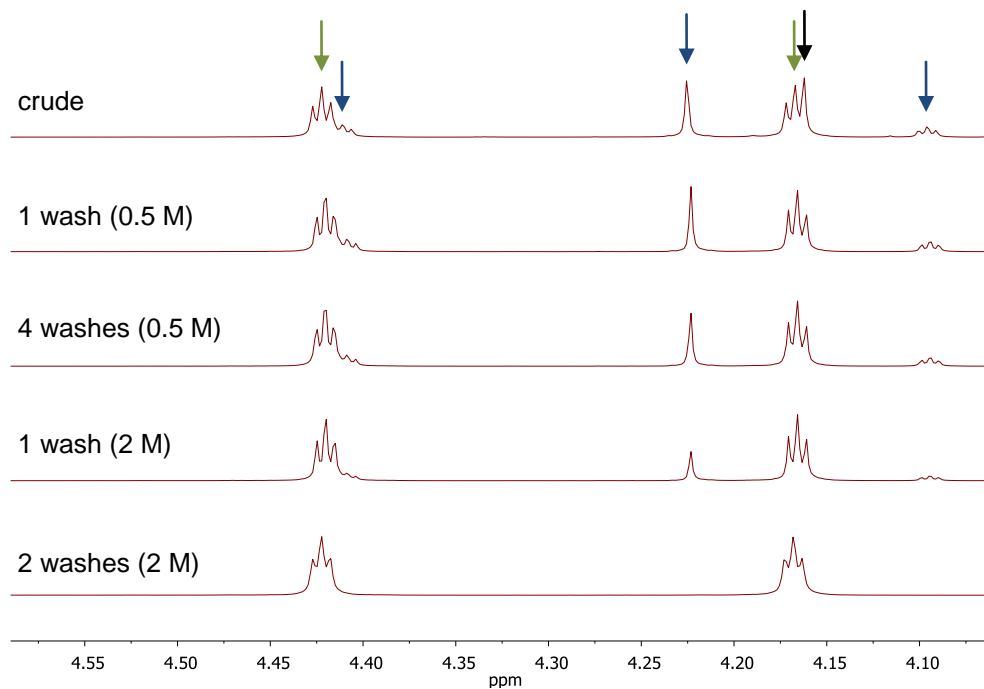

**Figure S3.** Selected <sup>1</sup>H NMR spectra in CDCl<sub>3</sub> showing the elimination of FcH (black arrow, after 1 wash with 0.5 M aqueous FeCl<sub>3</sub>) and FcBr (blue arrows, after 4 washings with 0.5 M aqueous FeCl<sub>3</sub> followed by 2 washings with 2 M aqueous FeCl<sub>3</sub>) from their mixture with fcBr<sub>2</sub> (green arrows).

$^1\text{H}$  NMR spectrum for FcBr in  $\text{CDCl}_3$

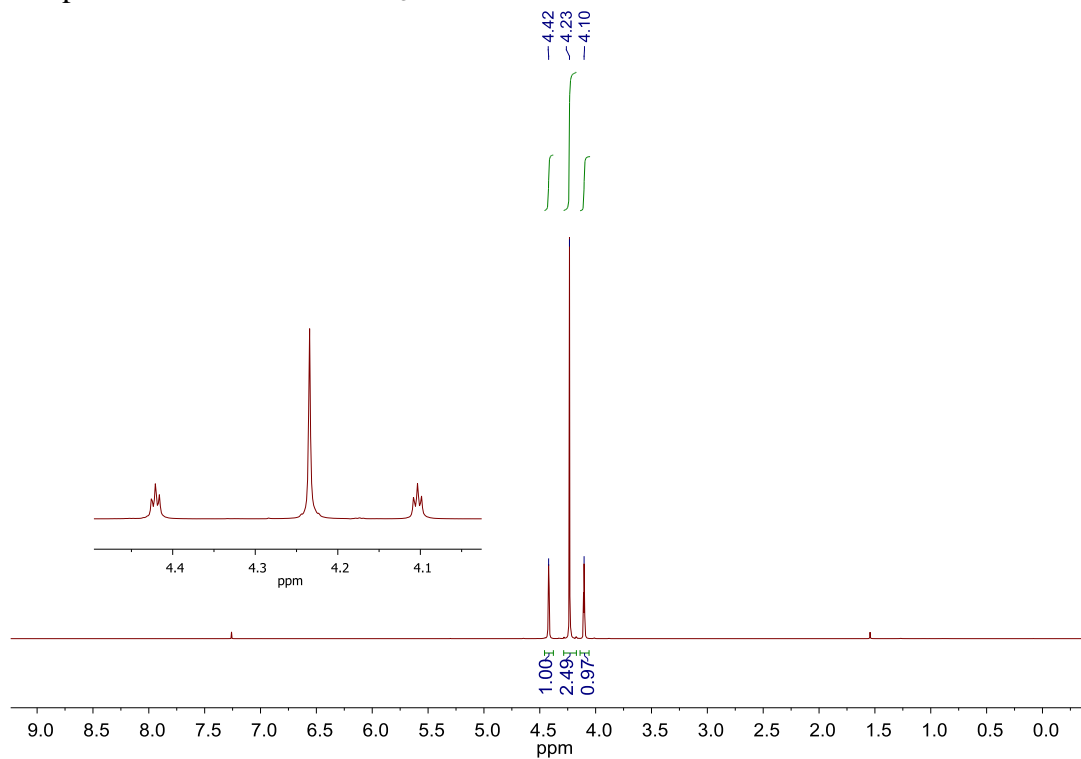

$^{13}\text{C}$  NMR spectrum for FcBr in  $\text{CDCl}_3$

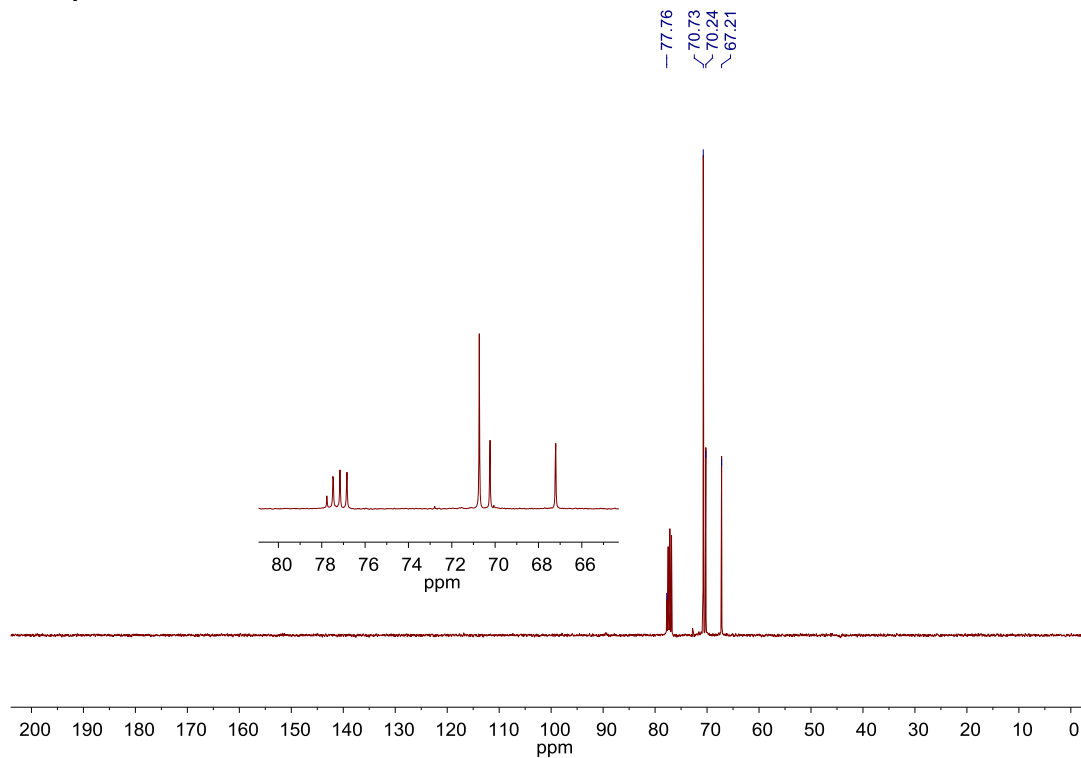

$^1\text{H}$  NMR spectrum for FcI in  $\text{CDCl}_3$

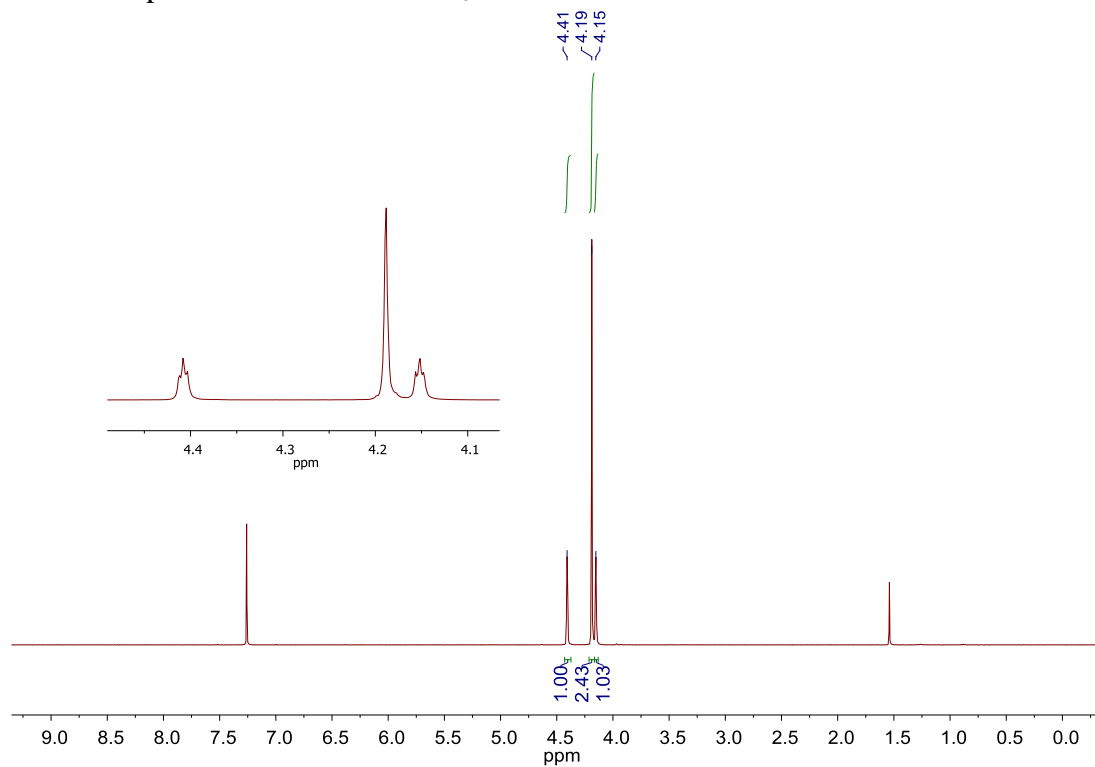

$^{13}\text{C}$  NMR spectrum for FcI in  $\text{CDCl}_3$

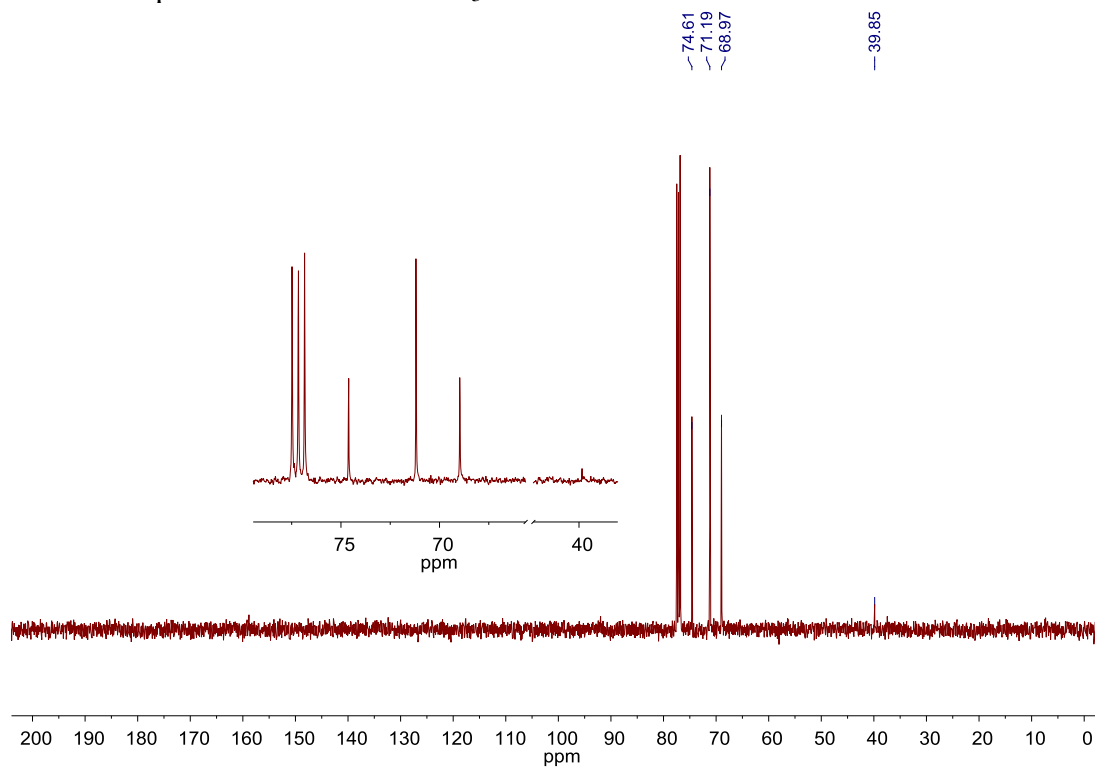

Supplement: c2dt32779a.pdf [file c2dt32779a.pdf]
